# Supplementary material for: The effect of lignin molecular weight on the formation and properties of carbon quantum dots
Source: Royal Society of Chemistry journal article supplement (doi:10.1039/d3gc04694j), 2024-01-01
Supplement: d3gc04694j1.pdf [file d3gc04694j1.pdf]

## Supplementary information

### Effect of lignin molecular weight on the formation and properties of carbon quantum dots

Xiaoli Liu <sup>a</sup>, Siyu Zhao <sup>a</sup>, Xinrui Cheng <sup>a</sup>, Xin Han <sup>a</sup>, Junhua Zhang<sup>b</sup>, Min Wu <sup>a</sup>, Xueping Song <sup>a\*</sup>  
, Zhanying Zhang <sup>c</sup>

a. Guangxi Key Laboratory of Clean Pulp & Papermaking and Pollution Control, College of Light Industry and Food Engineering, Guangxi University, Nanning 530004, PR China

b. Jiangsu Co-Innovation Center of Efficient Processing and Utilization of Forest Resources College of Chemical Engineering, Nanjing Forestry University, Nanjing 210037, China

c. School of Mechanical Medical and Process Engineering, Centre for Agriculture and the Bioeconomy, Queensland University of Technology, Brisbane, Queensland 4000, Australia

\*Corresponding author

Xueping Song (Email: [sx\\_ping@gxu.edu.cn](mailto:sx_ping@gxu.edu.cn), Song X)

## **Contents**

### **1. Materials and methods**

#### **1.1 Materials**

#### **1.2 Fractionation of lignin**

#### **1.3 Preparation of L-CQDs**

#### **1.4 Characterization of lignin fractions and L-CQDs**

#### **1.5 Measurement of quantum yield of L-CQDs**

#### **1.6 Biocompatibility**

#### **1.7 Cell imaging**

### **2. Figure S1 to S6**

### **3. Table S1 to S5**

### **4. References**

## **1. Materials and methods**

### **1.1 Materials**

Alkali lignin (AL) was purchased from Sigma-Aldrich (St. Louis, MI, USA) and AL was not purified before use. Acetone (AR, 98%), methanol (AR, 98%), n-hexane (AR, 98%), and dimethyl sulfoxide (DMSO) were provided by Macklin Corporation (Shanghai, China). All chemicals were purchased at analytical grade. Fetal bovine serum (FBS), trypsin-EDTA, phosphate buffered saline (PSB), MEM, 3-(4,5)-dimethylthiaziazolo (-z-y1)-3,5-di- phenytetrazoliumromide (MTT), and Luria-Bertani (LB) broth medium were purchased from Biological Industries Co., Ltd. (Israel). All reagents were used as received. Ultrapure water was prepared using a Milli-Q ultrapure water purification system (Merck KGaA, Germany).

### **1.2 Fractionation of lignin**

The method of lignin fractionation was modified based on the study of Wang et al.,<sup>1</sup> and the schematic diagram of the lignin fractionation process is shown in Supplemental Fig. S1†: 20 g of AL was added to 200 mL of acetone/methanol (7:3, v/v) co-solvent and stirred at 60 rpm for 30 min at 25 °C. Then the mixture was centrifuged (8000 rpm, 4 °C), and precipitate 1 and supernatant 1 were collected. precipitate 1 was labeled as lignin fraction F1. Subsequently, 20 mL of n-hexane was added to the supernatant 1 and the mixture was stirred with a glass rod for 1 min. After which the mixture was centrifuged (8000 rpm, 4 °C), and precipitate 2 and supernatant 2 were collected. The precipitate 2 was labeled as lignin fraction F2. Next, 40 mL of n-hexane was added to the collected supernatant 2, and the stirring and centrifugation operation of the previous

step was repeated to collect the precipitate 3 and supernatant 3. The precipitate 3 was labeled as lignin fraction F3. Similarly, 60 mL of hexane was added to the obtained supernatant 3, and the stirring and centrifugation operation of the previous step was repeated to obtain supernatant 4 and precipitate 4. The precipitate 4 was labeled as lignin fraction F4. Finally, the supernatant 4 was concentrated at 40 °C, and the residue lignin fraction F5 was obtained after solvent evaporation.

### **1.3 Preparation of L-CQDs**

AL (0.1 g) and 25 mL of deionized water were added to a 50 mL Polytetrafluoroethylene-lined reactor, which was then heated to 180 °C in an oven and maintained at this temperature for 12 hours. The solid particles were then removed by filtration through a 0.22 µm microporous membrane, and then the filtrate was dialyzed in ultrapure water with a dialysis bag (MWCO = 1000 Da) for 48 hours to remove incomplete small molecules. And the solid product was obtained by freeze-drying and named L-CQDs-0. The L-CQDs prepared using above five lignin fractions (F1, F2, F3, F4, and F5) under the same experimental conditions described above were named L-CQDs-1, L-CQDs-2, L-CQDs-3, L-CQDs-4, and L-CQDs-5, respectively.

### **1.4 Characterization of lignin fractions and L-CQDs**

The relative molecular weight and polydispersity (PDI) of lignin fractions were measured using gel permeation chromatography (GPC; Agilent PL-GPC50, USA) with DMSO as the mobile phase. <sup>31</sup>P NMR and 2D-HSQC nuclear magnetic resonance spectrometers (NMR, AVANCE IIIITM HD 500, Bruker, Germany) were used to determine the linkage structure as well as the phenolic hydroxyl content of lignin

fractions. The UV-Vis absorption spectra of lignin solutions were determined in the 200-600 nm range using a UV-Vis spectrophotometer (Hitachi U-4100 UV-Vis, Japan). A Fourier transform infrared spectrometer (FTIR, TENSOR II, Bruker, Germany) in attenuated total reflection (ATR) mode was used to determine the chemical structures of lignin samples and L-CQDs. An x-ray photoelectron spectroscopy (XPS, Thermo Fisher Scientific K-alpha+, USA) was used for the determination of the carbon, oxygen, and nitrogen contents and functional group compositions of lignin samples and L-CQDs surfaces. The microstructure of L-CQDs was observed using a transmission electron microscope (TEM, FEI TECNAI G2 F30, USA). The fluorescence spectra (FLs) of L-CQDs were measured using a fluorescence spectrometer (FS5, Edinburgh), and the slit widths of both excitation and emission light were 1.5 nm for FLs measurements, and the ordinate-valued PL spectra were used to quantify the fluorescence intensity. The compositions of the hydrothermal fluids at different hydrothermal times were tested using gas chromatography-mass spectrometry (GC-MS; Agilent 7890A GC-5975C MS, USA) with a HP-5MS column. The hydrothermal fluids (5mg/mL) tested by GC-MS. The GC-MS conditions were as follows: the split ratio was 1:1, the helium flow rate was 1.8 mL/min, the injection volume was set at 2  $\mu$ L, the injection temperature was set at 280  $^{\circ}$ C, and the column temperature was maintained at 60  $^{\circ}$ C for 2 min, then heated to 250  $^{\circ}$ C at a heating rate of 10  $^{\circ}$ C/min, and maintained for another 5 min.

### **1.5 Measurement of quantum yield of L-CQDs**

The quantum yields (QYs) of the L-CQDs were calculated using quinine sulfate (dissolved in 0.05 mol/L sulfuric acid; QY = 54%) as a reference.<sup>2</sup> The QY of the L-CQDs were calculated at the optimal excitation wavelength for each sample using the

equation :

$$QY = QY_{qs} \cdot \frac{S}{S_{qs}} \cdot \frac{A_{qs}}{A} \cdot \frac{\eta^2}{\eta_{qs}^2}$$

where QY is the quantum yield of the L-CQDs, qs denotes the quinine sulfate reference solution, S means the integral area of the fluorescence peak in the photoluminescence (PL) spectra of the L-CQDs, A is the absorbance of the L-CQDs at the excitation wavelength, and  $\eta$  represents the refractive index of the solution.

## 1.6 Biocompatibility

The toxicity of L-CQDs-3 on L02 cells was evaluated by MTT method. L02 cells in logarithmic growth phase were diluted with complete medium to a cell density of  $1 \times 10^4$  cells/mL, and then inoculated into 96-well plates with 100  $\mu$ L per well. 96-well plates were cultured at 37 °C in a 5% CO<sub>2</sub> thermostatic cell culture incubator. After 24 hours of incubation, the original medium was aspirated and different concentrations of L-CQDs-3 (0.1, 0.25, 0.5, 1, 2, 0.5, 1, 2 mg/mL) were added. Then 150  $\mu$ L of DMSO was added to each well, and after sufficient shaking, the absorbance value of each well was measured at 570 nm using an enzyme marker (EPOCH2, Biotek), and then cell viability was calculated:

$$\text{Cell relative viability}(\%) = \frac{A_{\text{sample}}}{A_{\text{control}}} \cdot 100\%$$

where A denotes the absorbance value at 570 nm.

## 1.7 Cell imaging

L02, HepG2 and *E. coli* cells in logarithmic growth phase were collected and counted, and the cells were counted and seeded in laser confocal dishes at  $4 \times 10^3$

cells/well containing different media (1640 medium with 20% FBS for L02 cells; MEM medium with 10% FBS for HepG2 cells; LB broth medium for *E. coli*). L-CQDs-3 was dissolved in all three media at a concentration of 0.5 mg/mL, respectively. Cells were then incubated at 37 °C and 5% CO<sub>2</sub> in a constant temperature incubator for 24 h. The medium was removed and each well was washed three times with PBS. Images of the three cells were captured using a laser scanning confocal microscopy (LSCM) at excitation wavelengths of 405 nm, 488 nm, and 559 nm, respectively.

## 2. Figure S1 to S6

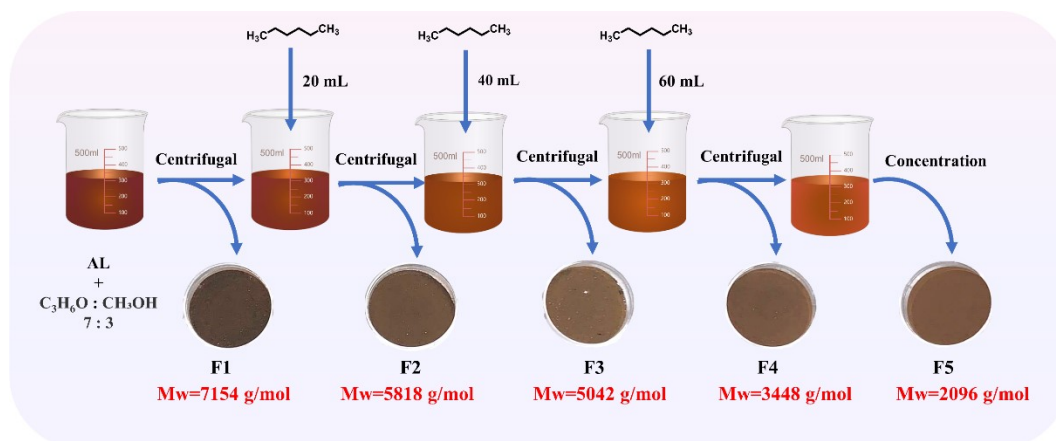

**Figure S1.** Schematic diagram of the lignin grading process.

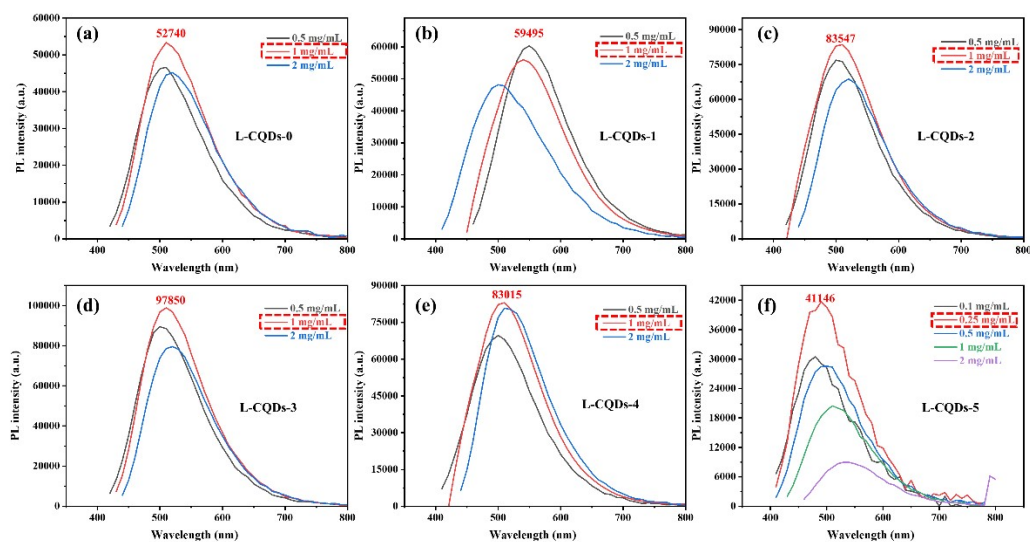

**Figure S2.** Emission spectra of (a) L-CQDs-0, (b) L-CQDs-1, (c) L-CQDs-2, (d) L-CQDs-3, (e)

L-CQDs-4 and (f) L-CQDs-5 at optimal excitation wavelengths at different concentrations.



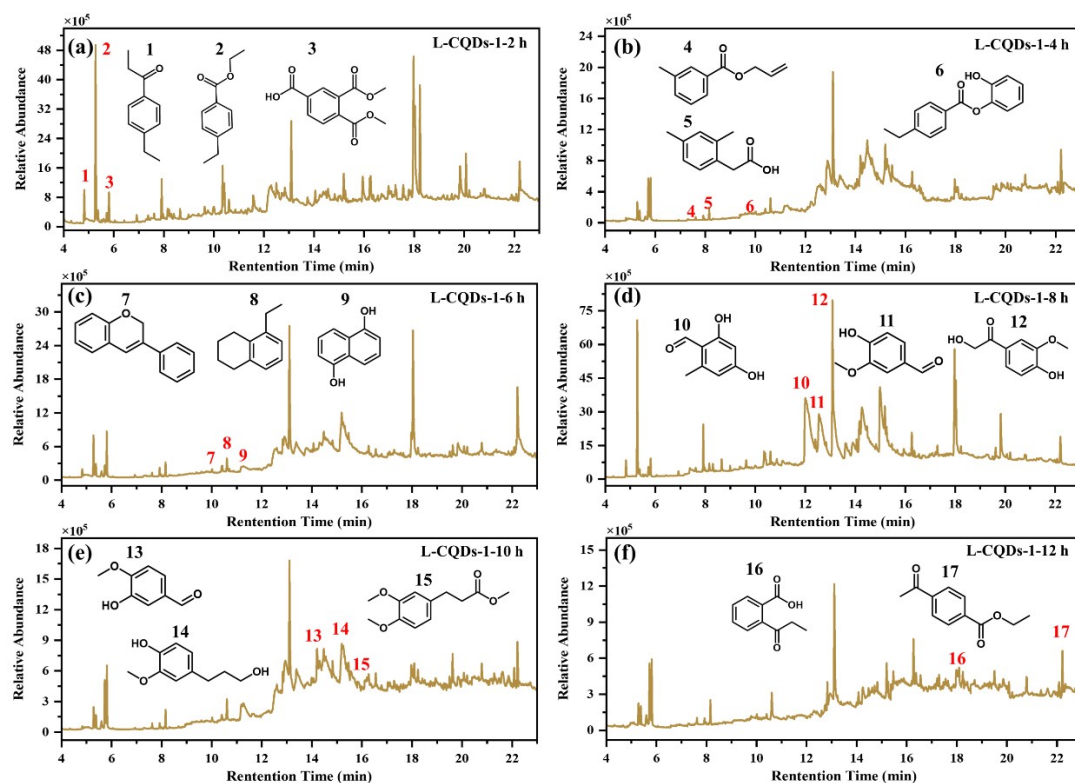

**Figure S3.** TIC spectra of L-CQDs-1 from F1 with different hydrothermal times: (a) 2 h, (b) 4 h, (c) 6 h, (d) 8 h, (e) 10 h, (f) 12 h.

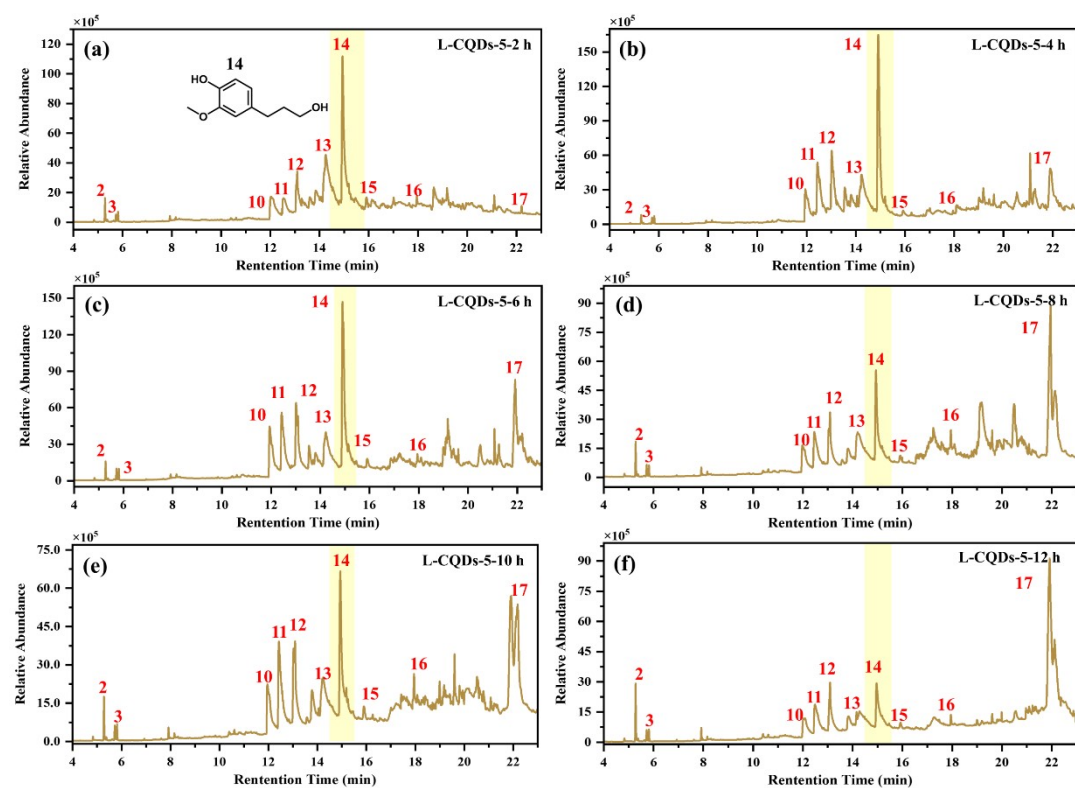

**Figure S4.** TIC spectra of L-CQDs-5 from F5 with different hydrothermal times: (a) 2 h, (b) 4 h, (c) 6 h, (d) 8 h, (e) 10 h, (f) 12 h.

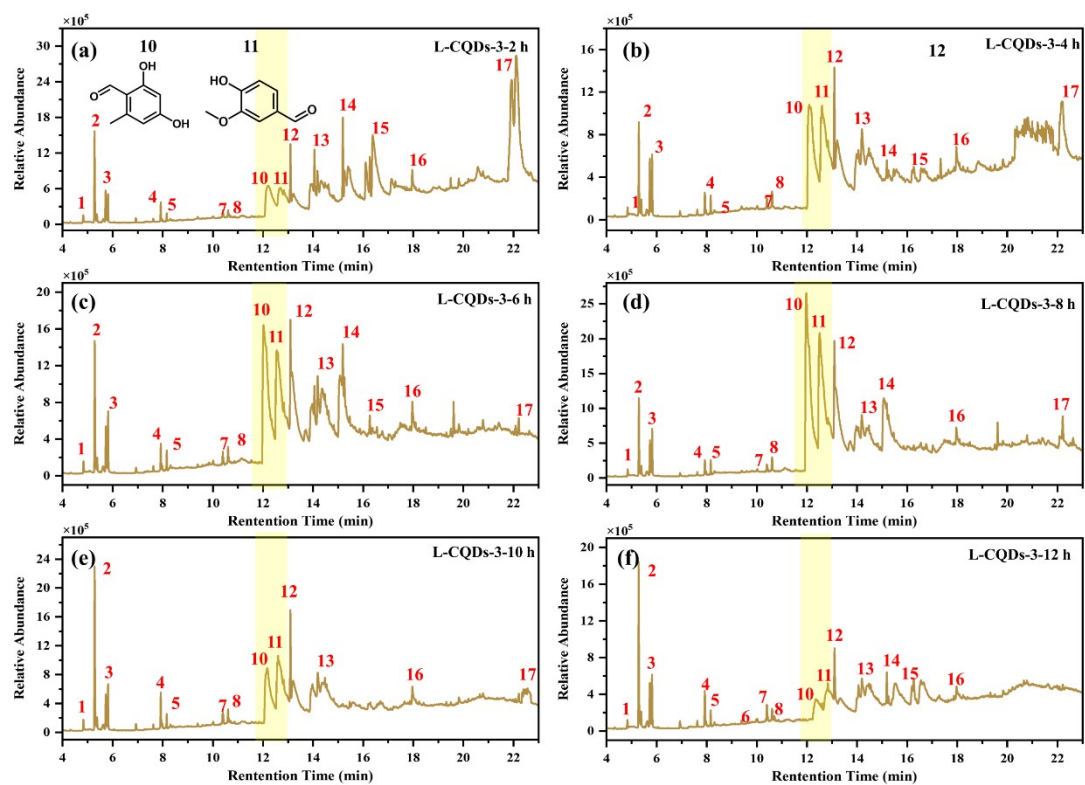

**Figure S5.** TIC spectra of L-CQDs-3 from F3 with different hydrothermal times: (a) 2 h, (b) 4 h, (c) 6 h, (d) 8 h, (e) 10 h, (f) 12 h.

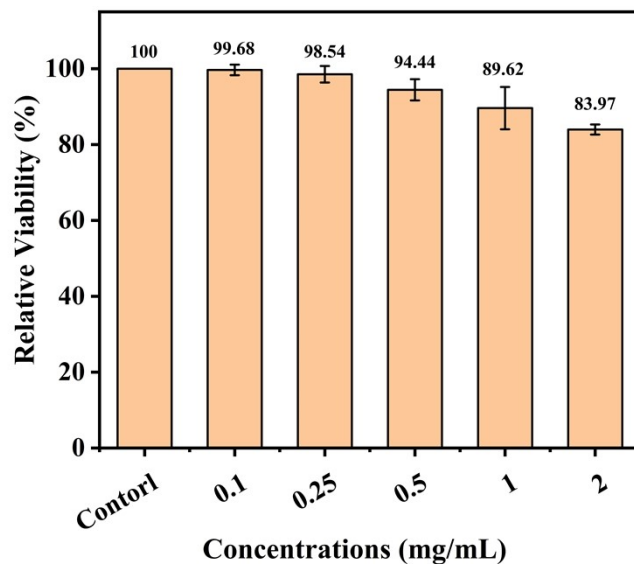

**Figure S6.** Effects of different concentrations of L-CQDs-3 on the activity of L02 cells.

### 3. Table S1 to S5

**Table S1 Molecular weight statistics of lignin samples**

| Samples | Yields (%) | Mw (g/mol) | Mn (g/mol) | PDI |
|---------|------------|------------|------------|-----|
| AL      |            | 3864       | 562        | 6.9 |
| F1      | 32.8       | 7154       | 2527       | 2.8 |
| F2      | 16.1       | 5818       | 2634       | 2.2 |
| F3      | 17.8       | 5042       | 2374       | 2.1 |
| F4      | 9.4        | 3448       | 2031       | 1.7 |
| F5      | 23.5       | 2096       | 1007       | 2.1 |

**Table S2. Statistical table of <sup>31</sup>P NMR of lignin samples**

| Samples                                      | $\delta$ (ppm)    | AL   | F1   | F2   | F3   | F4   | F5   |
|----------------------------------------------|-------------------|------|------|------|------|------|------|
| <b>Aliphatic OH</b>                          | 148.91–<br>144.97 | 1.79 | 2.07 | 2.17 | 2.01 | 1.86 | 1.14 |
| <b>C<sub>5</sub>-substituted phenolic OH</b> | 143.99–<br>141.17 | 1.15 | 0.66 | 0.97 | 1.11 | 1.28 | 0.10 |
| <b>Guaiacyl phenolic OH</b>                  | 141.14–<br>137.98 | 1.49 | 0.71 | 1.10 | 1.24 | 1.61 | 3.01 |
| <b>p-Hydroxyphenyl phenolic OH</b>           | 137.88–<br>136.79 | 0.10 | 0.05 | 0.08 | 0.06 | 0.12 | 0.16 |
| <b>Carboxylic acid OH</b>                    | 135.29–<br>133.04 | 0.14 | 0.06 | 0.07 | 0.08 | 0.09 | 0.21 |
| <b>Total OH</b>                              |                   | 4.67 | 3.55 | 4.39 | 4.50 | 4.96 | 5.52 |
| <b>Total phenolic OH</b>                     |                   | 2.74 | 1.42 | 2.15 | 2.41 | 3.01 | 4.16 |

**Table S3. 2D-HSQC NMR statistics of lignin samples**

| <b>Lable</b>                    | <b><math>\delta C/\delta H</math> (ppm)</b> | <b>Assignments</b>                                                                 |
|---------------------------------|---------------------------------------------|------------------------------------------------------------------------------------|
| <b>-OCH<sub>3</sub></b>         | 55.5/3.70                                   | C-H in methoxyls                                                                   |
| <b>A<math>\gamma</math></b>     | 59.9/3.55                                   | C $\gamma$ -H $\gamma$ in $\beta$ -O-4' substructures (A)                          |
| <b>F<math>\gamma</math></b>     | 61.6/4.01                                   | C $\gamma$ -H $\gamma$ in p-hydroxycinnamyl alcohol end groups (F)                 |
| <b>C<math>\gamma</math></b>     | 63.0/3.63                                   | C $\gamma$ -H $\gamma$ in phenylcoumaran substructures (C)                         |
| <b>B<math>\gamma</math></b>     | 71.0/3.65—4.06                              | C $\gamma$ -H $\gamma$ in $\beta$ - $\beta'$ resinol substructures (B)             |
| <b>A<math>\alpha</math></b>     | 71.16/4.70                                  | C $\alpha$ -H $\alpha$ in $\beta$ -O-4' substructures (A)                          |
| <b>A<math>\beta</math>(G/H)</b> | 84.2/4.20                                   | C $\beta$ -H $\beta$ in $\beta$ -O-4' substructures linked to G/H units (A)        |
| <b>B<math>\alpha</math></b>     | 85.17/4.54                                  | C $\alpha$ -H $\alpha$ in $\beta$ - $\beta'$ resinol substructures (B)             |
| <b>G<sub>2</sub></b>            | 110.54/6.82                                 | C <sub>2</sub> -H <sub>2</sub> in guaiacyl units (G)                               |
| <b>FA<sub>2</sub></b>           | 112.46/7.41                                 | C <sub>2</sub> -H <sub>2</sub> in ferulate (FA)                                    |
| <b>PCE<sub>3,5</sub></b>        | 115.5/6.73                                  | C <sub>3,5</sub> -H <sub>3,5</sub> in p-coumarate (PCE)                            |
| <b>G<sub>6</sub></b>            | 119.3/6.81                                  | C <sub>6</sub> -H <sub>6</sub> in guaiacyl units (G)                               |
| <b>FA<sub>6</sub></b>           | 120.2/7.15                                  | C <sub>6</sub> -H <sub>6</sub> in ferulate (FA)                                    |
| <b>F<math>\beta'</math></b>     | 125.74/6.88                                 | C $\beta$ -H $\beta$ in the terminal group structure of hydroxycinnamaldehyde (F') |
| <b>H<sub>2,6</sub></b>          | 128.48/7.13                                 | C <sub>2,6</sub> -H <sub>2,6</sub> in p-hydroxyphenyl units (H)                    |

**Table S4. Optical properties of L-CQDs.**

| <b>Samples</b> | <b>Optimal excitation wavelength (nm)</b> | <b>Optimal emission wavelength (nm)</b> | <b>Fluorescence intensity</b> | <b>Quantum yield (%)</b> |
|----------------|-------------------------------------------|-----------------------------------------|-------------------------------|--------------------------|
| L-CQDs-0       | 410                                       | 510                                     | 52740                         | 1.31                     |
| L-CQDs-1       | 400                                       | 500                                     | 59495                         | 2.26                     |
| L-CQDs-2       | 420                                       | 510                                     | 83548                         | 3.34                     |
| L-CQDs-3       | 420                                       | 510                                     | 97850                         | 3.86                     |
| L-CQDs-4       | 410                                       | 510                                     | 83015                         | 3.28                     |
| L-CQDs-5       | 410                                       | 510                                     | 41147                         | 1.04                     |

**Table S5. GC-MS results of hydrothermal liquid products of lignin at different times.**

| Numbers | Retention time (min) | Compounds                                           | Matching rate (%) | Structural formula |
|---------|----------------------|-----------------------------------------------------|-------------------|--------------------|
| 1       | 4.85                 | 4'-Ethylpropiophenone                               | 38                |                    |
| 2       | 5.28                 | 4-Ethylbenzoic acid, ethyl ester                    | 38                |                    |
| 3       | 5.81                 | 1,2,4-Benzenetricarboxylic acid, 1,2-dimethyl ester | 43                |                    |
| 4       | 7.89                 | m-Toluic acid, allyl ester                          | 38                |                    |
| 5       | 8.17<br>8.65         | Acetic acid, (2,4-xylyl)-                           | 27                |                    |
| 6       | 9.64                 | 1,2-Benzenediol, o-(4-ethylbenzoyl)-                | 50                |                    |
| 7       | 10.37                | 3-Phenyl-2H-chromene                                | 11                |                    |
| 8       | 10.62                | Naphthalene, 5-ethyl-1,2,3,4-tetrahydro-            | 15                |                    |
| 9       | 11.29                | 1,5-Naphthalenediol                                 | 11                |                    |
| 10      | 12.26                | Benzaldehyde, 2,4-dihydroxy-6-methyl-               | 90                |                    |
| 11      | 12.50                | Vanillin                                            | 95                |                    |
| 12      | 13.11                | 2,4'-Dihydroxy-3'-methoxyacetophenone               | 35                |                    |
| 13      | 14.56                | Benzaldehyde, 3-hydroxy-4-methoxy-                  | 42                |                    |
| 14      | 15.20                | Benzenepropanol, 4-hydroxy-3-methoxy-               | 60                |                    |

|    |       |                                                     |    |                                                                                     |
|----|-------|-----------------------------------------------------|----|-------------------------------------------------------------------------------------|
| 15 | 16.03 | Benzenepropanoic acid, 3,4-dimethoxy-, methyl ester | 42 | 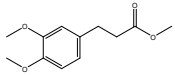 |
| 16 | 18.01 | Phenol, 4-ethyl-2-methoxy-                          | 87 |  |
| 17 | 22.22 | Ethyl 4-acetylbenzoate                              | 27 |  |

---

## 4. References

1. Y.-Y. Wang, M. Li, C. E. Wyman, C. M. Cai and A. J. Ragauskas, *ACS Sustain. Chem. Eng.*, 2018, **6**, 6064-6072.
2. S. Zhao, G. Yue, X. Liu, S. Qin, B. Wang, P. Zhao, A. J. Ragauskas, M. Wu and X. Song, *Adv. Compos. Hybrid Mater.*, 2023, **6**, 73-85.
